# Supplementary material
Source: HighWire-hosted journal article supplement (https://gut.bmj.com/content/gutjnl-2024-331903)

## Supplementary Figure 1

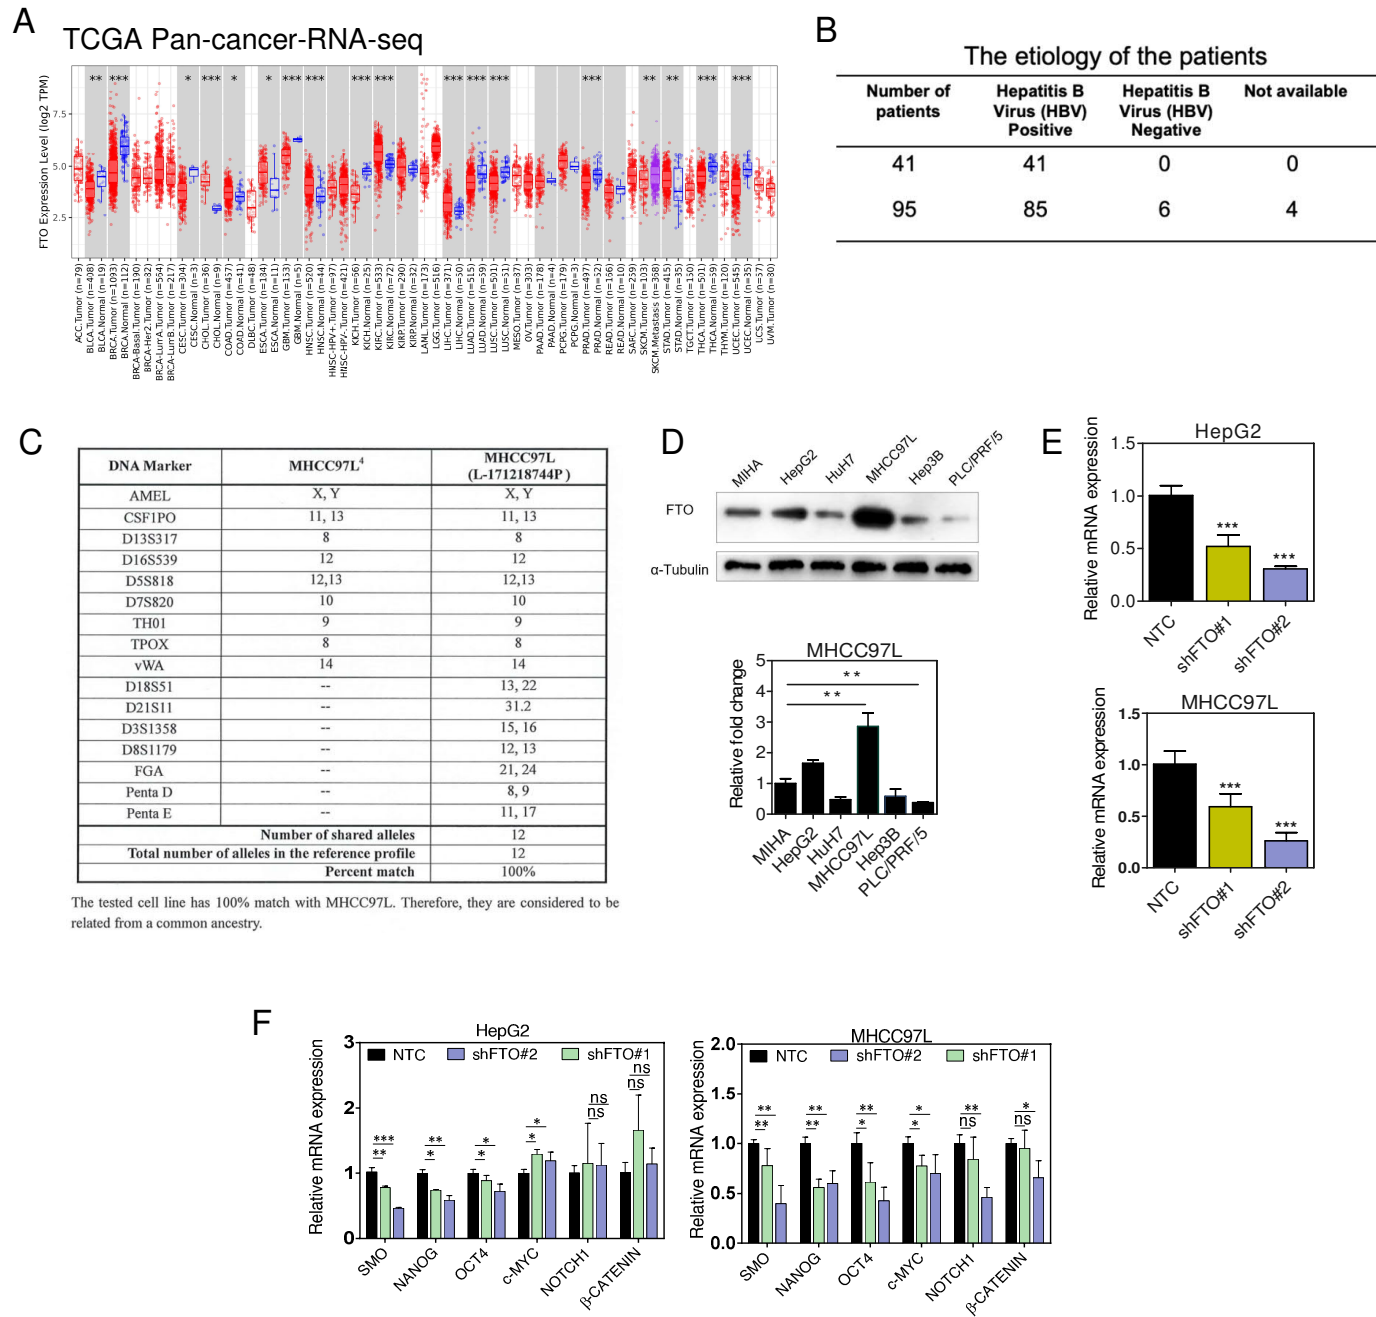

## Supplementary Figure 2

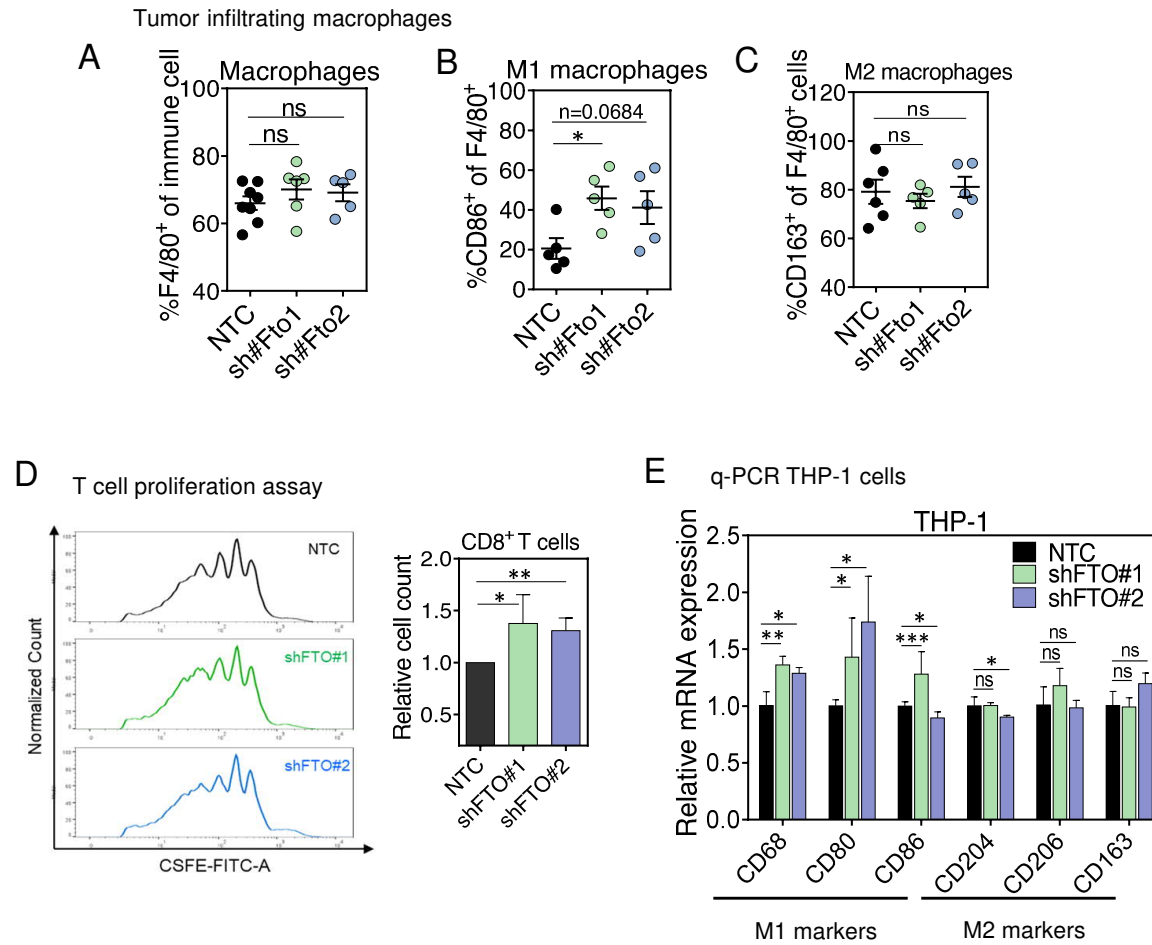

## Supplementary Figure 3

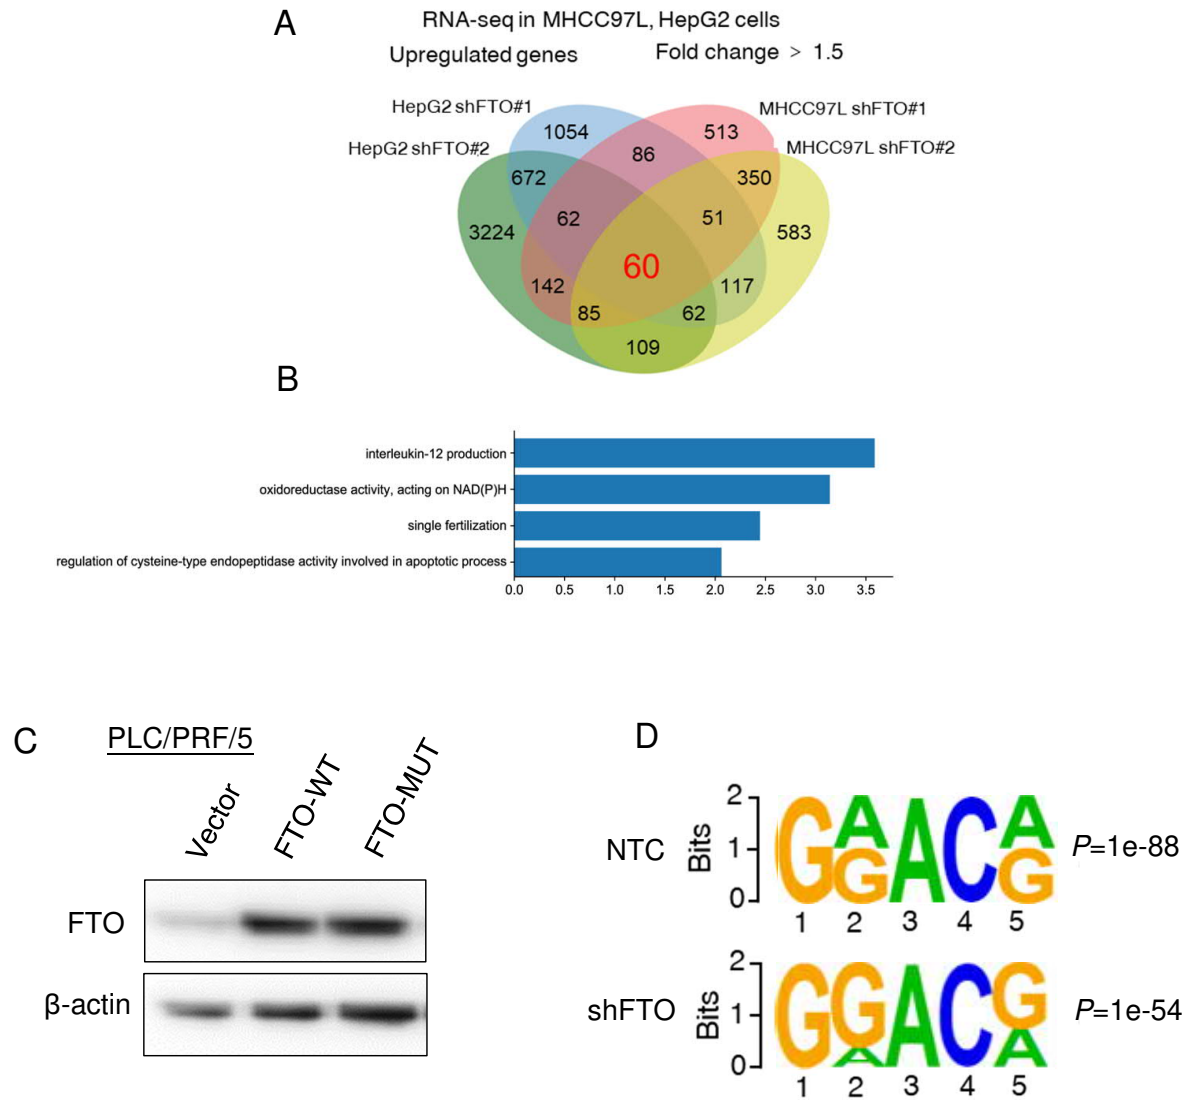

## Supplementary Figure 4

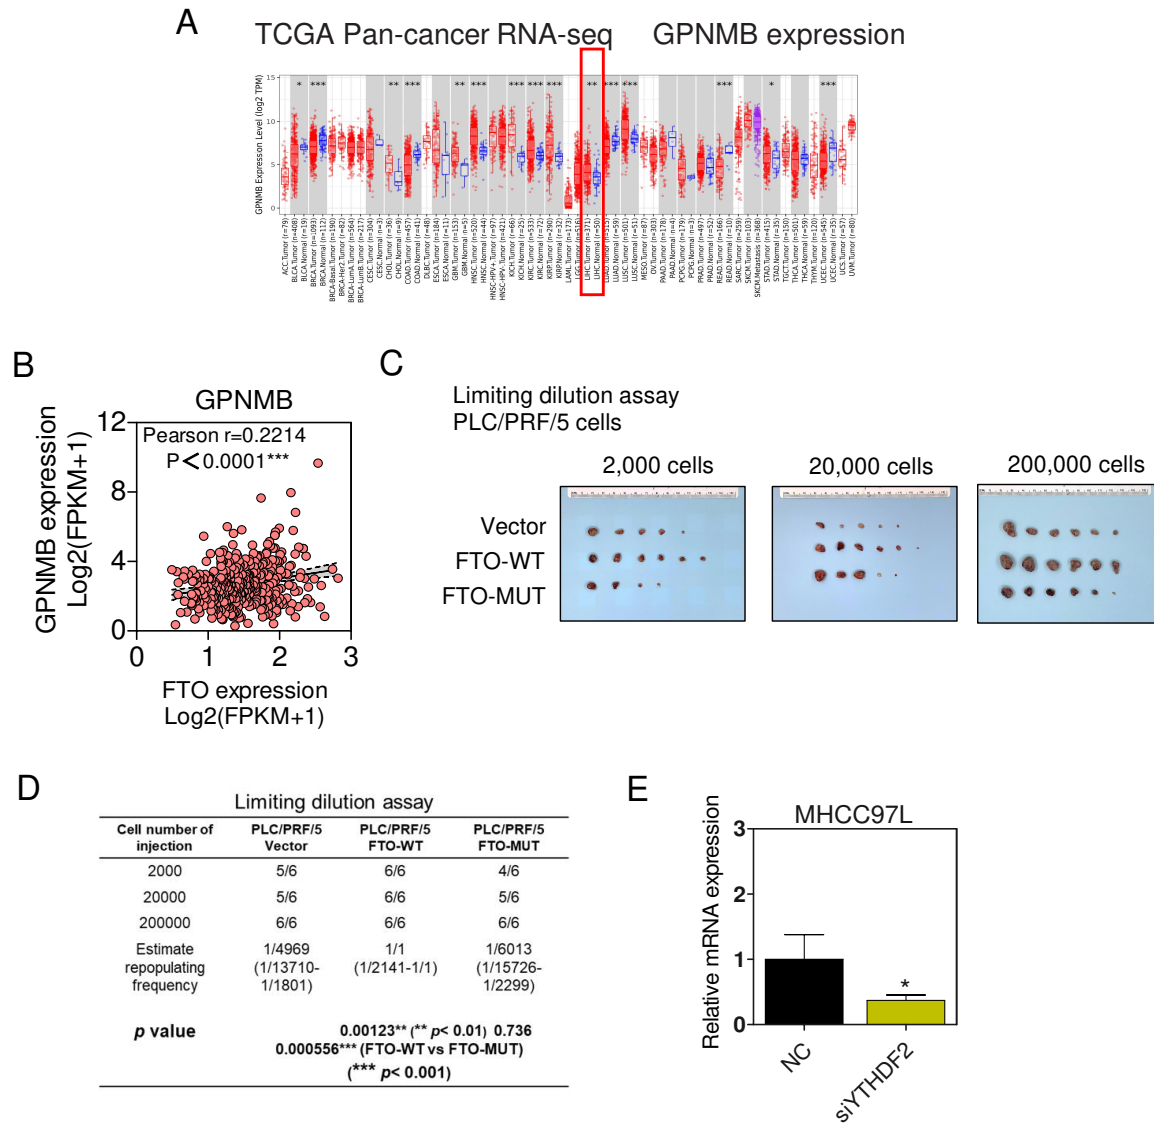

## Supplementary Figure 5

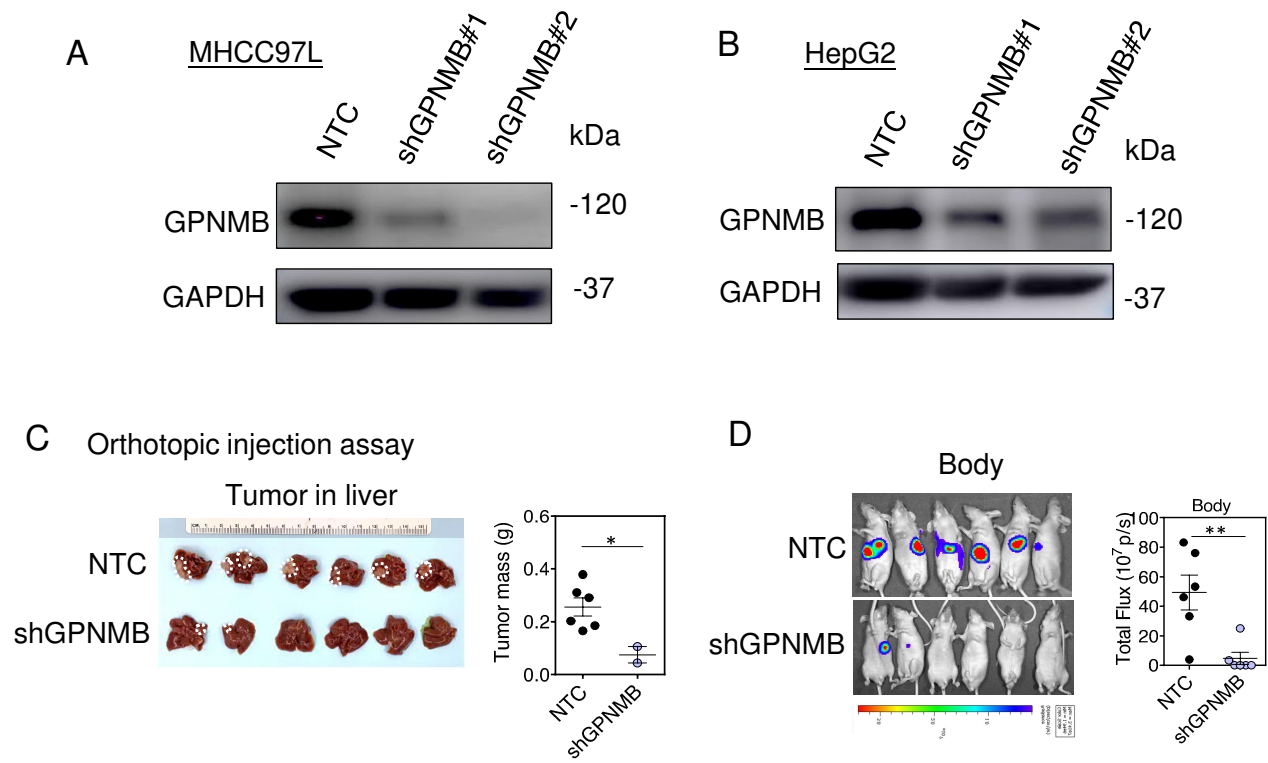

## Supplementary Figure 6

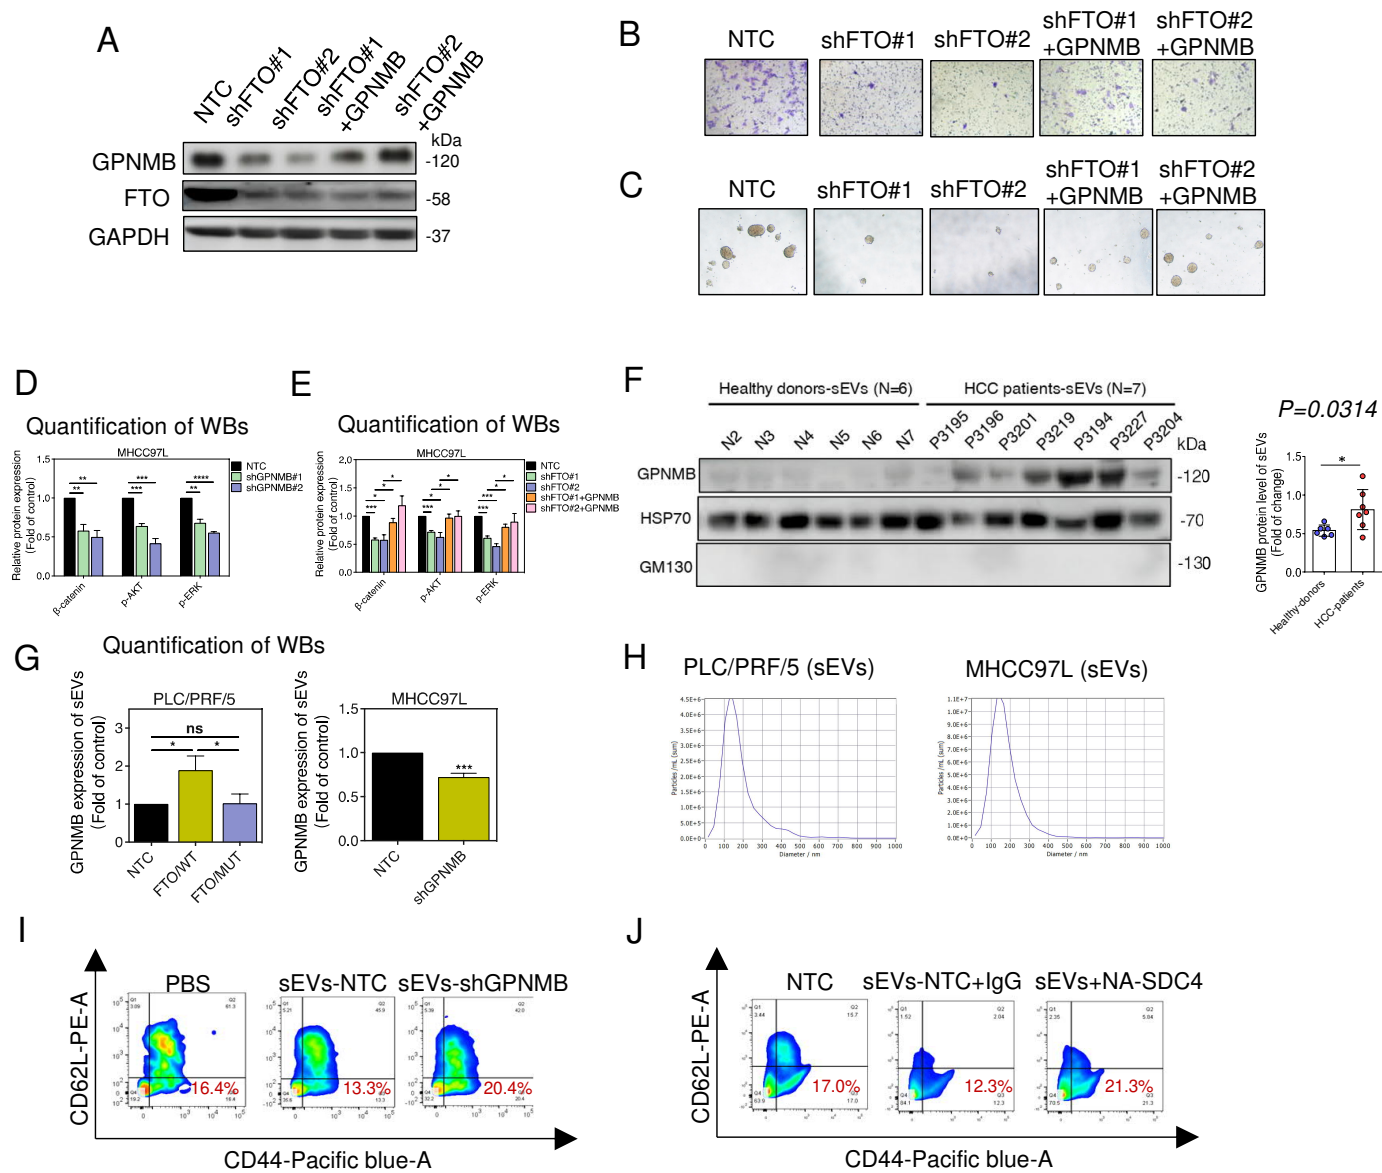

## Supplementary Figure 7

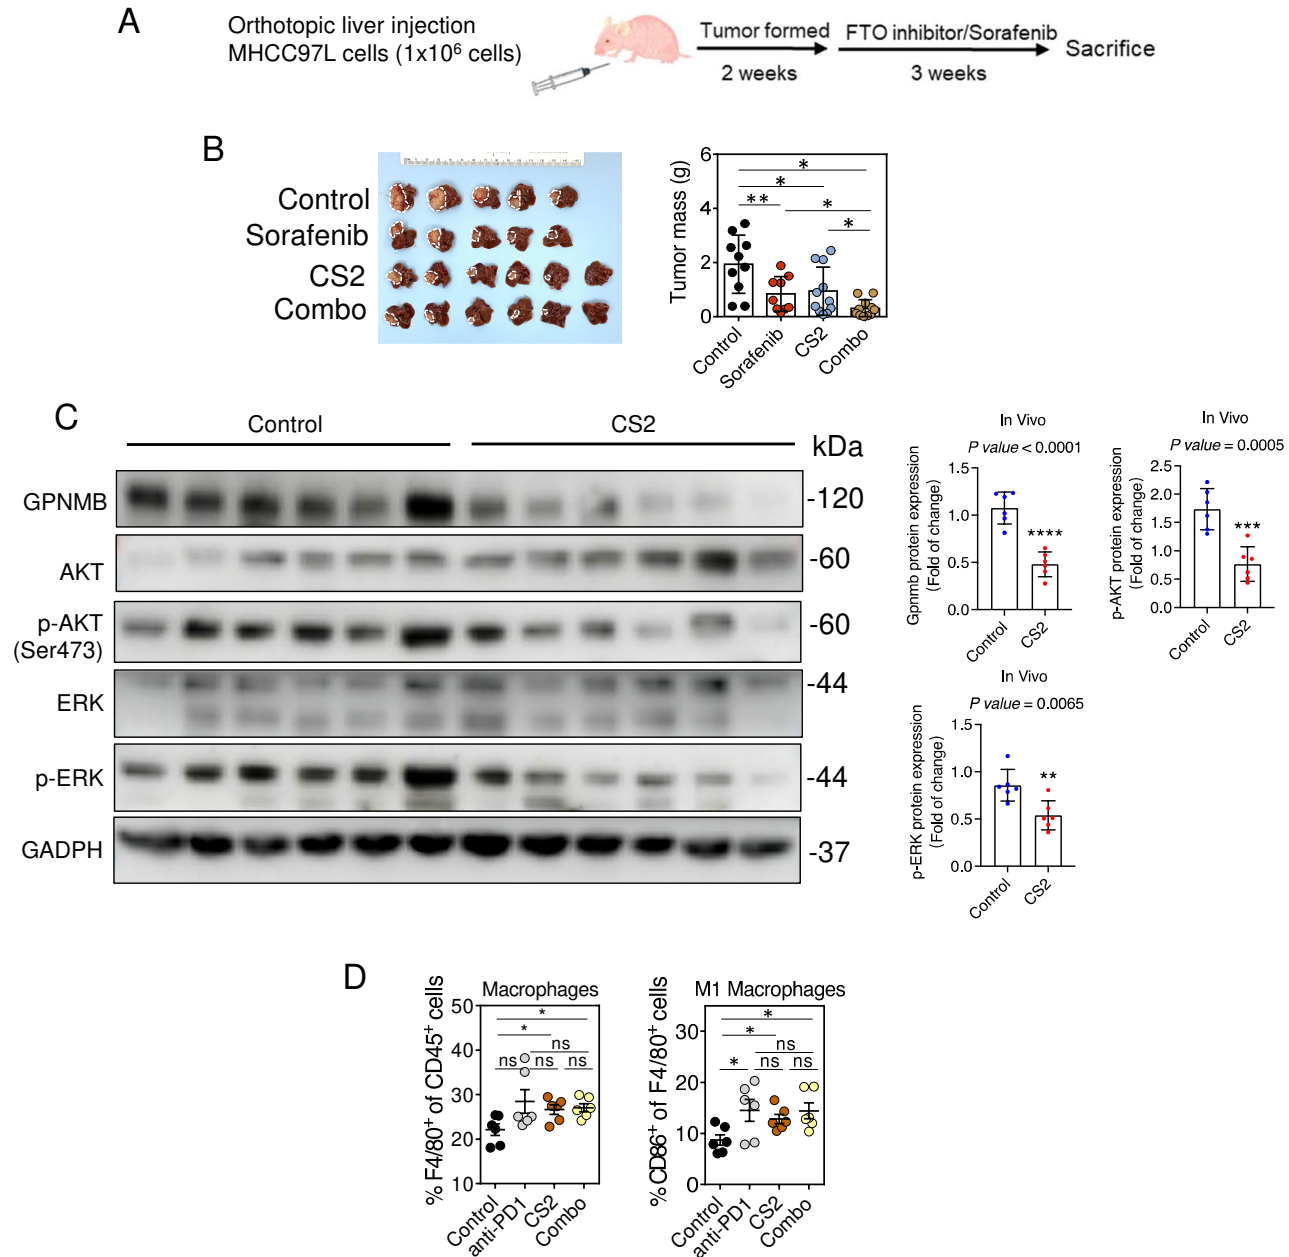



## Supplementary Figure 8

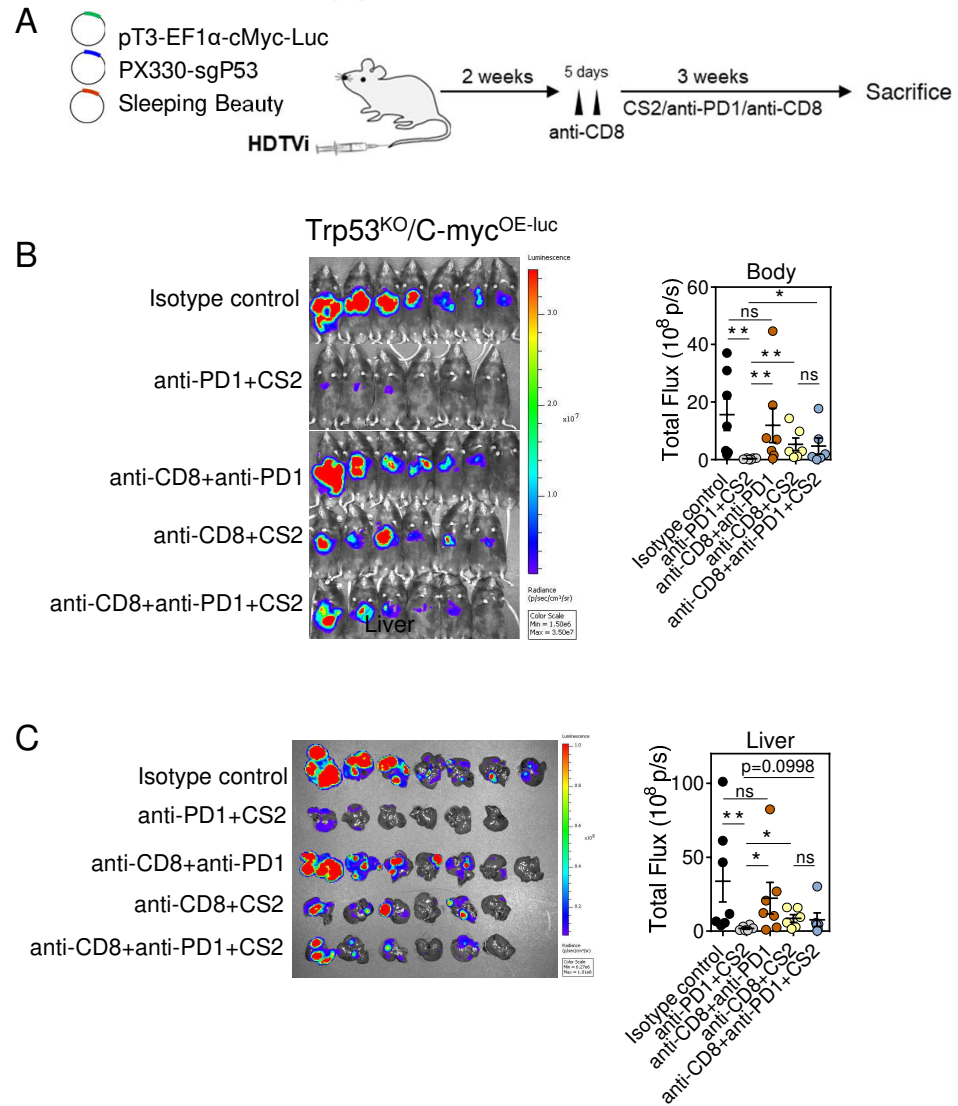

Supplement: inline-supplementary-material-1 [file inline-supplementary-material-1.pdf]
